# Supplementary material
Source: Springer Nature journal article supplement (https://www.springermedizin.de/resource/supplementary/12885_2013_4153_MOESM6_ESM.pdf/9465582)
Supplement: MOESM6 [file 9465582]

**A**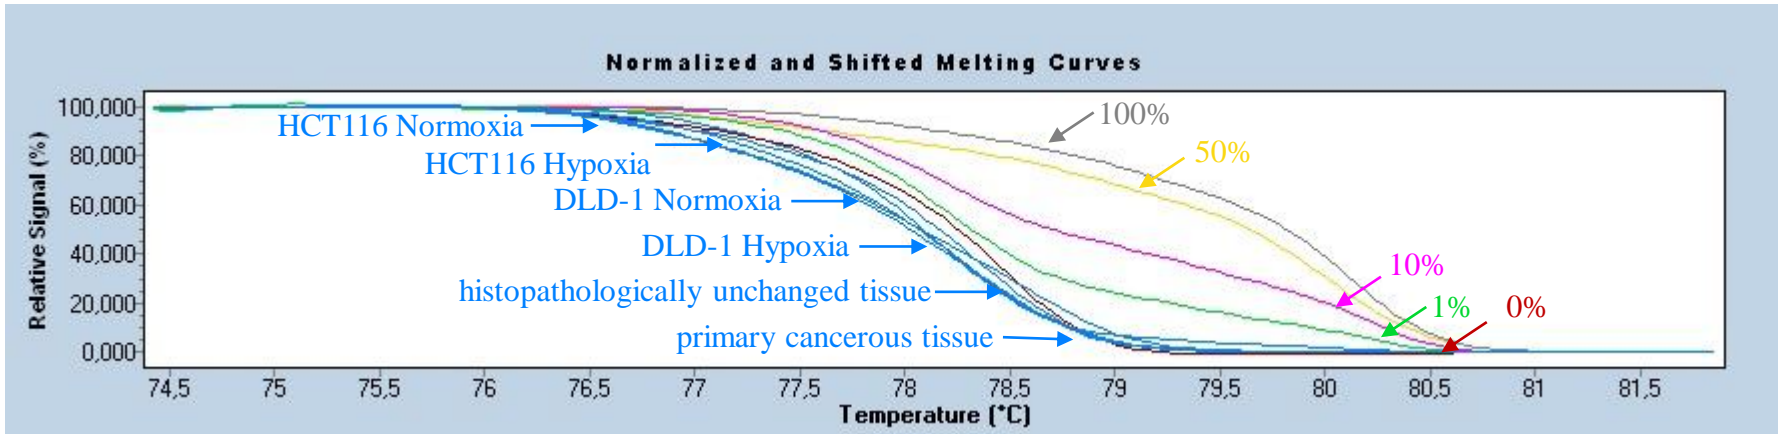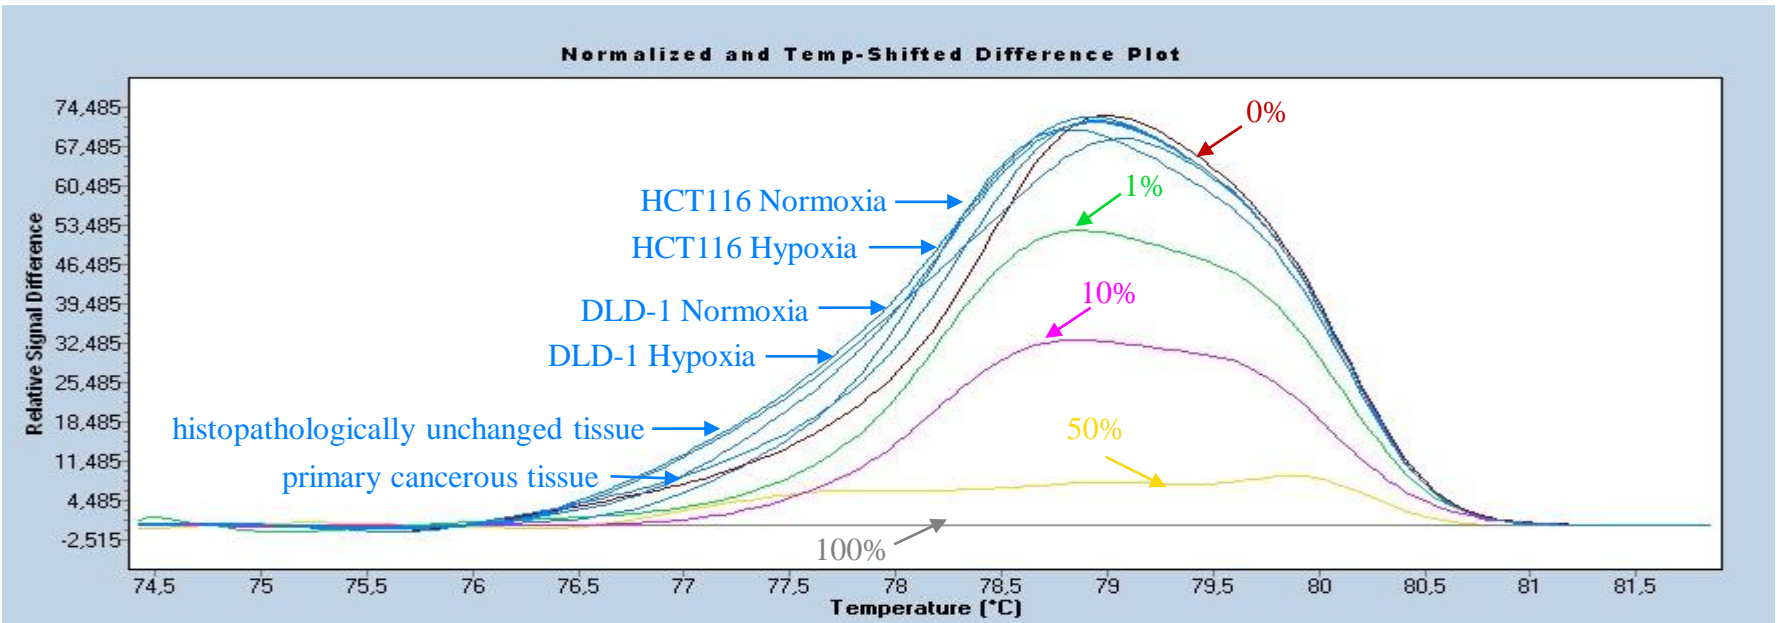

**B**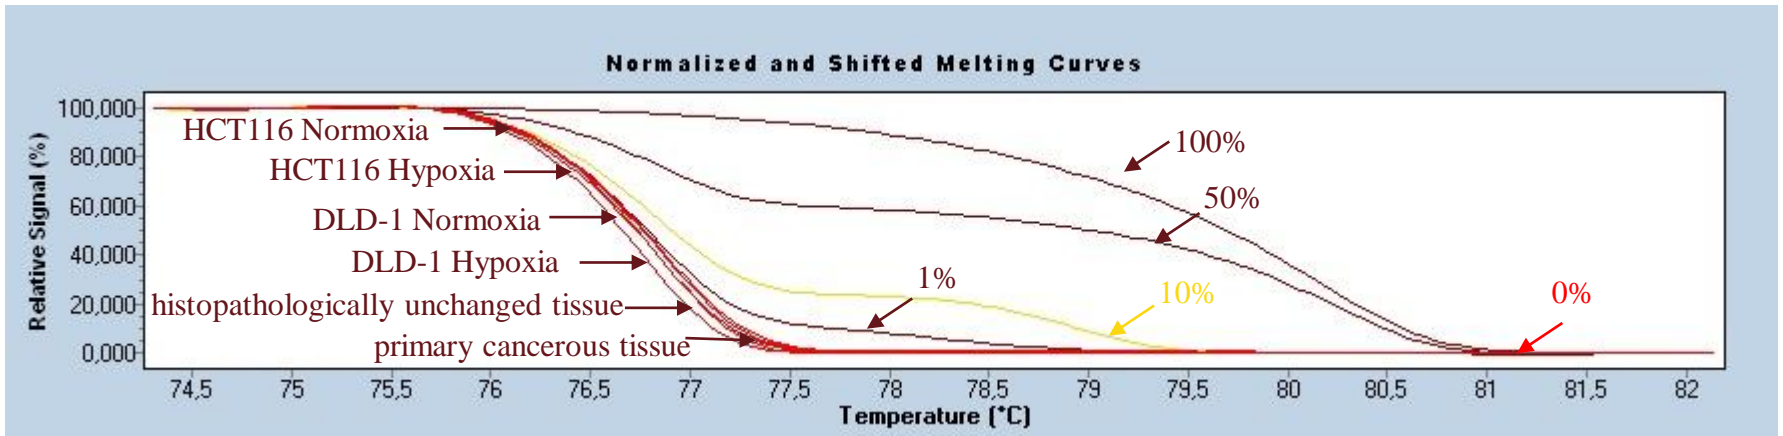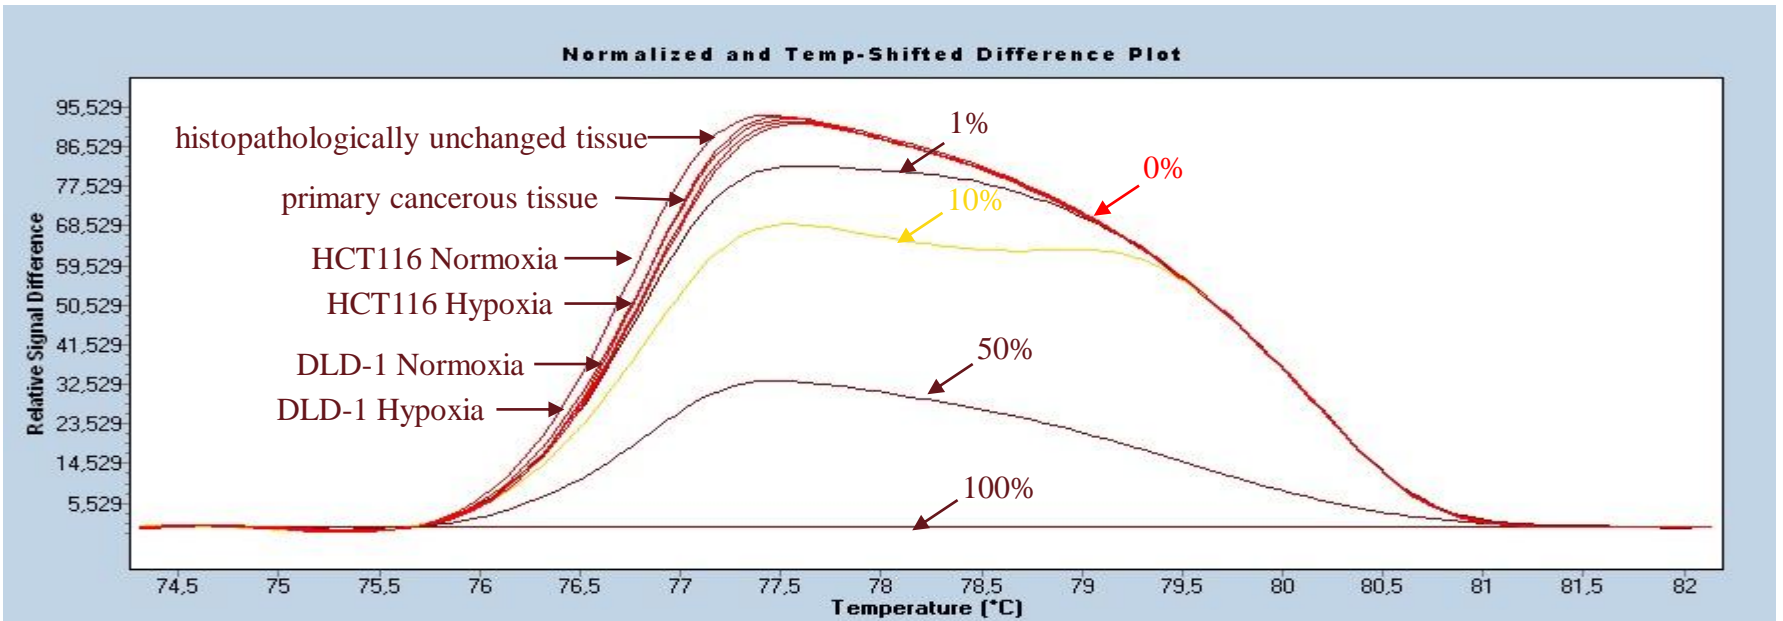

**C****Normalized and Shifted Melting Curves**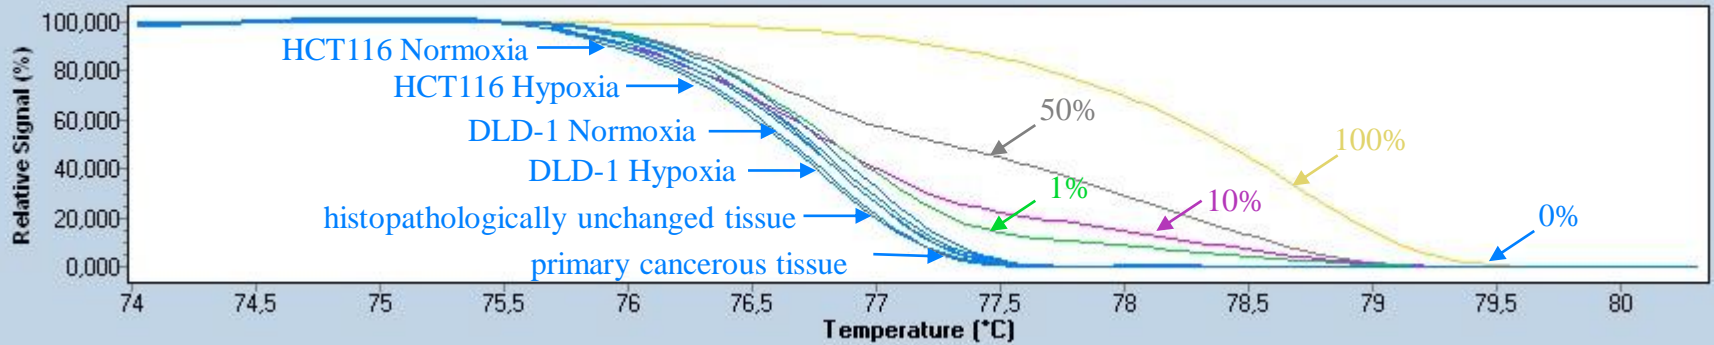**Normalized and Temp-Shifted Difference Plot**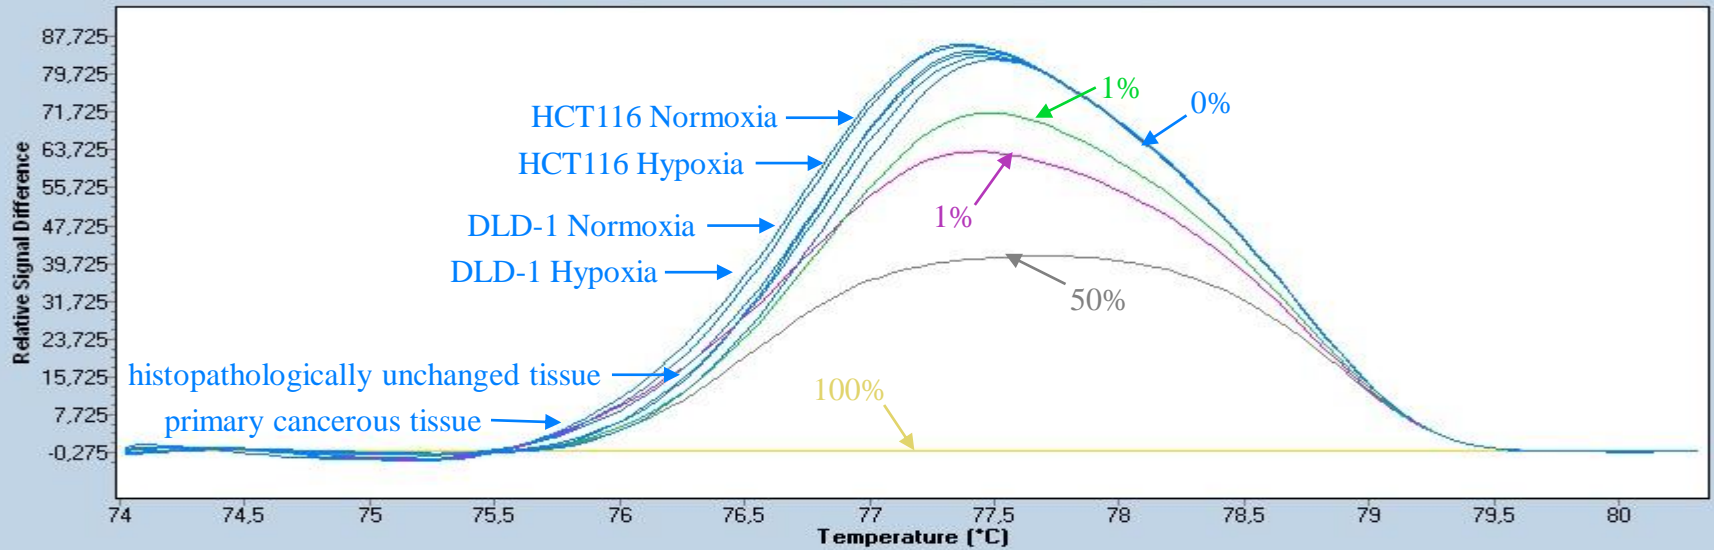

**D**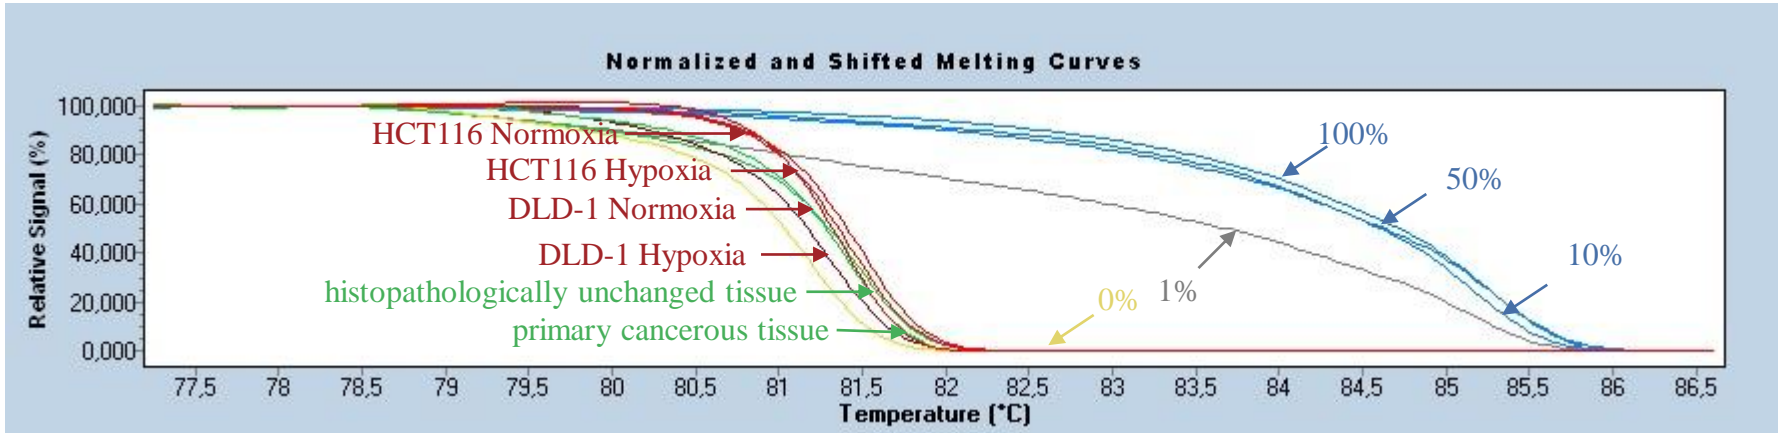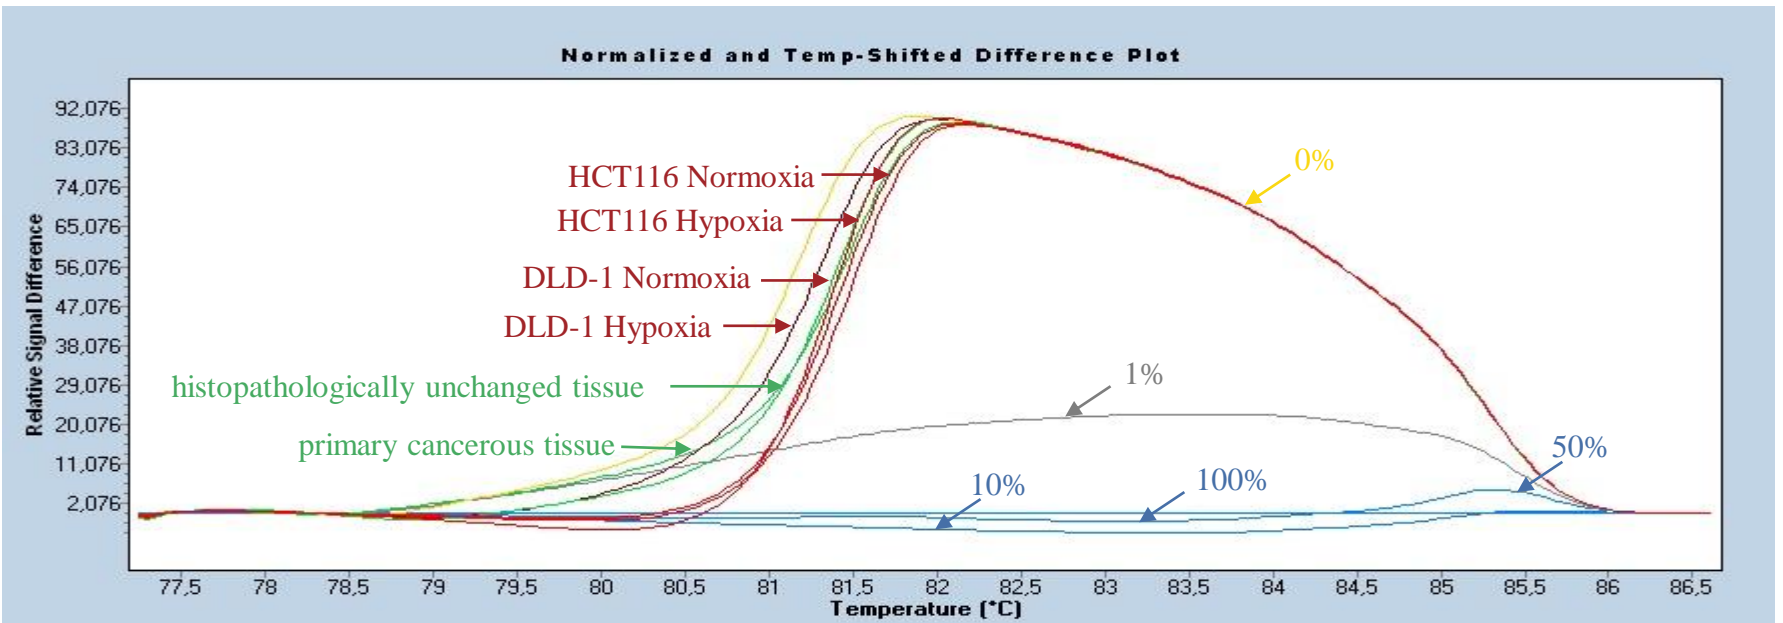

**E**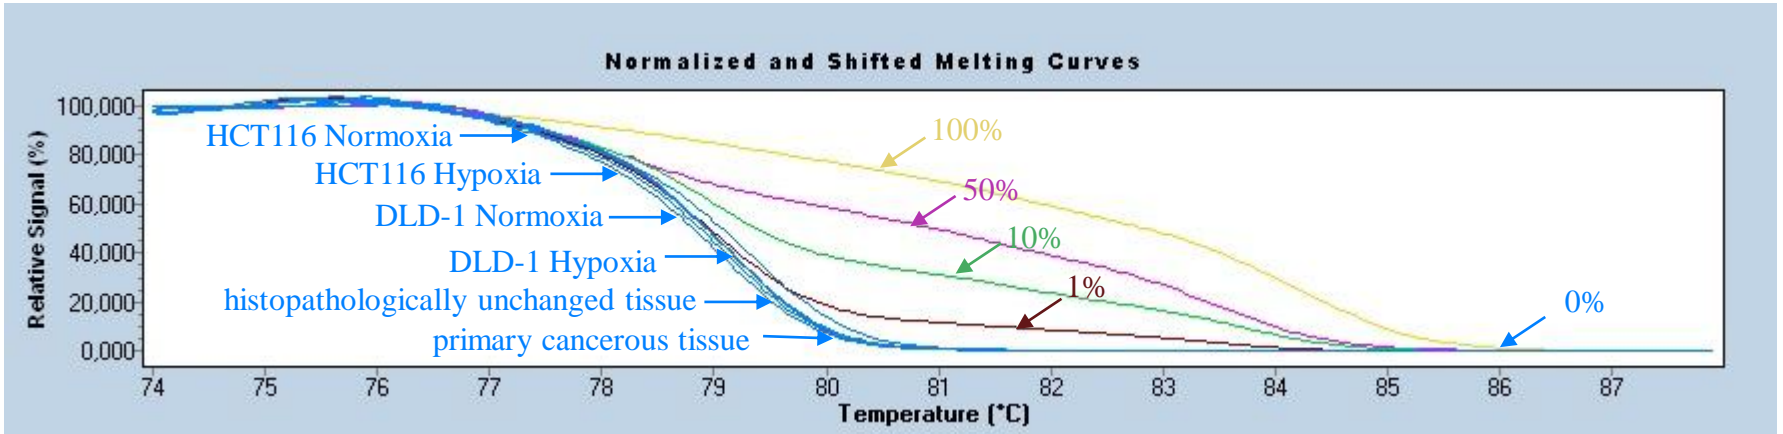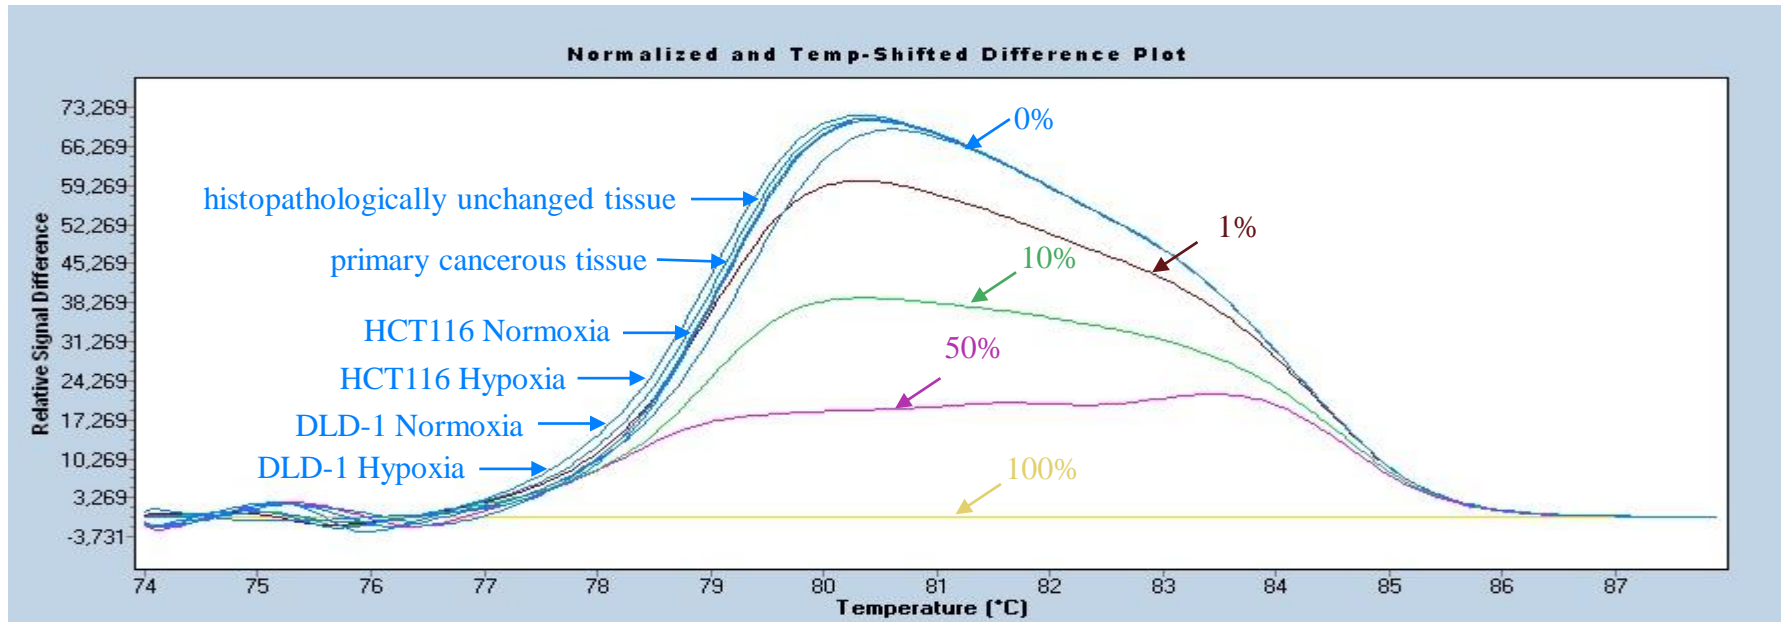

**F****Normalized and Shifted Melting Curves**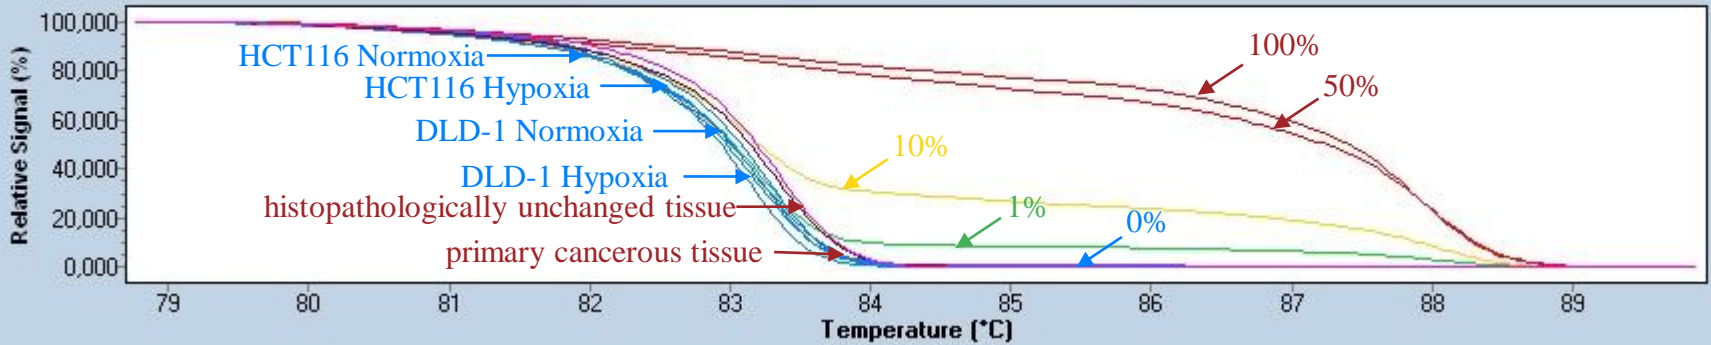**Normalized and Temp-Shifted Difference Plot**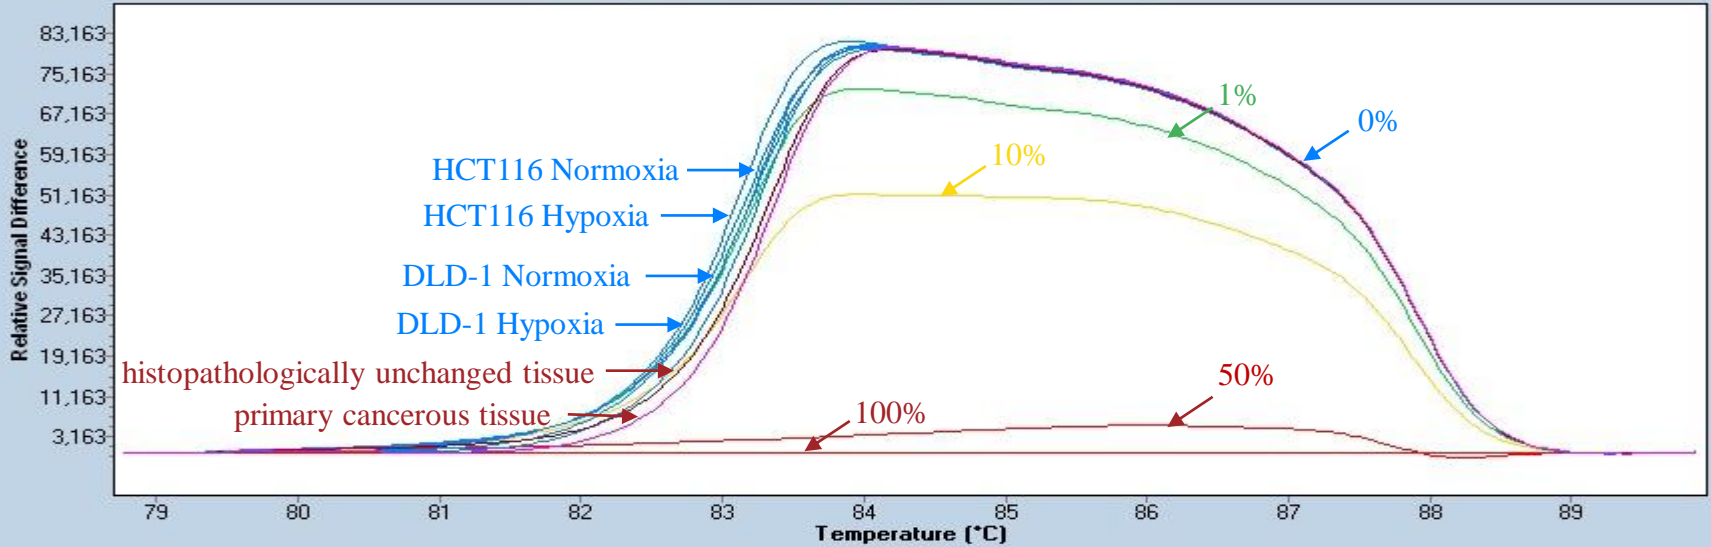

**Additional file 5. DNA methylation assessment of *PHD1*, *PHD2* and *FIH* gene regulatory region by HRM analysis.**

Methylation percentage of three DNA fragments within the *PHD1*, *PHD2* and *FIH* CpG island (Additional file 1, Additional file 2) was determined by Real Time PCR amplification of bisulfite treated standard, patient DNA and cell line DNA followed by comparison of their HRM profiles. DNA standards were prepared by mixing different ratios of methylated and non-methylated bisulfite treated DNA. HRM methylation analysis was performed using Light Cycler®480 Gene Scanning software, Roche Diagnostics GmbH (Mannheim, Germany). Each PCR amplification and HRM profile analysis was performed in triplicate. A, B, C, D, E and F represent HRM profiles of standard, patient and cell line DNA PCR product for primers numbered PHD1.1, PHD1.2, PHD2.1, PHD2.2, PHD2.3 and FIH.1 respectively.
